# Supplementary material for: Social and Environmental Determinants of Health and Cardio-Kidney-Metabolic Syndrome–Related Mortality
Source: PubMed Central journal article supplement (PMC11427959; doi:10.1001/jamanetworkopen.2024.35783), 2024-09-26
Supplement: jamanetwopen-e2435783-s001.pdf [file jamanetwopen-e2435783-s001.pdf]

## Supplemental Online Content

Vieira de Oliveira Salerno PR, Cotton A, Elgudin YE, et al. Social and environmental determinants of health and cardio-kidney-metabolic ckm syndrome–related mortality. *JAMA Netw. Open.* 2024;7(9):e2435783. doi:10.1001/jamanetworkopen.2024.35783

**eTable 1.** Different Exposures Considered for Inclusion in Our Study

**eTable 2.** ICD Codes Used to Define CKM

**eMethods.**

**eFigure 1.** Distribution of the County-Level Food Insecurity Rate Tertile in Each US State

**eFigure 2.** Distribution of the Primary Healthcare Access Rate Tertile in Each US State

**eFigure 3.** Distribution of the Air Pollution Concentration Tertile in Each US State

**eFigure 4.** Distribution of the Race/Ethnic Minority Rate in Each US State

**eFigure 5.** Distribution of the Rurality Rate in Each US State

**eFigure 6.** Distribution of the High School Completion Rate in Each US State

**eFigure 7.** Cardio-Kidney-Metabolic Syndrome Related Mortality Rates for Each US State

**eTable 3.** Tertile Values for Each SEDoH

**eTable 4.** Relative Importance of Exposures

**eFigure 8.** Map of  $R^2$  and  $P$ -Values From the Model

This supplemental material has been provided by the authors to give readers additional information about their work.

**eTable 1.** Different Exposures Considered for Inclusion in Our Study

| Race/Ethnicity and Population Structure | Description                                                                                                                                    | Year | Original Source | Race/Ethnicity and Population Structure |
|-----------------------------------------|------------------------------------------------------------------------------------------------------------------------------------------------|------|-----------------|-----------------------------------------|
| Hispanic Population                     | Percentage of population identifying as Hispanics                                                                                              | 2017 | Census -PE      | Hispanic Population                     |
| Non-Hispanic White                      | Percentage of Non-Hispanic White population                                                                                                    | 2017 | Census -PE      | Non-Hispanic White                      |
| Non-Hispanic Black                      | Percentage of Non-Hispanic African American population                                                                                         | 2017 | Census -PE      | Non-Hispanic Black                      |
| Asian and Pacific Islander              | Percentage of Asian and Pacific Islander population                                                                                            | 2017 | Census -PE      | Asian and Pacific Islander              |
| Female Population                       | Percentage of female population                                                                                                                | 2017 | Census -PE      | Female Population                       |
| Rural Population                        | Percentage of people living in rural areas                                                                                                     | 2010 | Census -PE      | Rural Population                        |
| Population above 65 years               | Percentage of population age 65 years or older                                                                                                 | 2017 | Census -PE      | Population above 65 years               |
| Population under 18 years               | Percentage of population age 18 years or younger                                                                                               | 2017 | Census -PE      | Population under 18 years               |
| <b>Environmental Exposure</b>           |                                                                                                                                                |      |                 | <b>Environmental Exposure</b>           |
| Particulate Matter 2.5 Level in Air     | PM <sub>2.5</sub> levels in air, µg/m <sup>3</sup> (annual average)                                                                            | 2018 | EPA - EJSCREEN  | Particulate Matter 2.5 Level in Air     |
| Diesel Particulate Matter Level in Air  | Diesel particulate matter level in air, µg/m <sup>3</sup>                                                                                      | 2017 | EPA- EJSCREEN   | Diesel Particulate Matter Level in Air  |
| Ozone Level in Air                      | Ozone summer seasonal average of daily maximum 8 h concentration in air in parts per billion                                                   | 2018 | EPA- EJSCREEN   | Ozone Level in Air                      |
| Air Toxics Cancer Risk                  | Lifetime exposure to air toxics cancer risk (in persons per million)                                                                           | 2017 | EPA- EJSCREEN   | Air Toxics Cancer Risk                  |
| Proximity to NPL Sites                  | Count of proposed or listed NPL—also known as superfund—sites within 5 km (or nearest one beyond 5 km), each divided by distance in km         | 2020 | EPA - EJSCREEN  | Proximity to NPL Sites                  |
| Proximity to RMP Sites                  | Count of RMP (potential chemical accident management plan) facilities within 5 km (or nearest one beyond 5 km), each divided by distance in km | 2020 | EPA - EJSCREEN  | Proximity to RMP Sites                  |

|                                        |                                                                                                               |            |                   |                                        |
|----------------------------------------|---------------------------------------------------------------------------------------------------------------|------------|-------------------|----------------------------------------|
| Traffic Proximity and Volume           | Average annual daily count of vehicles at major roads within 500 m, divided by distance in meters             | 2019       | EPA - EJSCREEN    | Traffic Proximity and Volume           |
| <b>Health Behaviors and Conditions</b> |                                                                                                               |            |                   | <b>Health Behaviors and Conditions</b> |
| Adult Smoking                          | Percentage of adults who are current smokers (age-adjusted)                                                   | 2017       | CDC - BRFSS       | Adult Smoking                          |
| Obesity                                | Percentage of the adult population (aged $\geq 18$ y) that reports a body mass index $\geq 30$ (age-adjusted) | 2017       | CDC - DSS         | Obesity                                |
| Diabetes                               | Percentage of adults (age $\geq 20$ ) with diagnosed diabetes (age-adjusted)                                  | 2017       | CDC - DSS         | Diabetes                               |
| Low Birthweight                        | Percentage of live births with low birthweight ( $< 2,500$ grams)                                             | 2013-2019  | CDC - NCHS        | Low Birthweight                        |
| Flu Vaccinations                       | Percentage of fee-for-service Medicare enrollees that had an annual flu vaccination                           | 2017       | CMS -MMD          | Flu Vaccinations                       |
| Excessive Drinking                     | Percentage of adults reporting binge or heavy drinking (age-adjusted)                                         | 2017       | CDC - BRFSS       | Excessive Drinking                     |
| Access to Exercise Opportunities       | Percentage of people with adequate access to locations for physical activity                                  | 2010, 2019 | ESRI & Census -TF | Access to Exercise Opportunities       |
| Physically Inactive                    | Percentage of adults (age $\geq 18$ y) reporting no leisure-time physical activity (age-adjusted)             | 2017       | CDC- DSS          | Physically Inactive                    |
| Poor Mental Health Days                | Average number of mentally unhealthy days reported in past 30 days (age-adjusted).                            | 2019       | CDC - BRFSS       | Poor Mental Health Days                |
| Insufficient Sleep                     | Percentage of adults who report fewer than 7 hours of sleep on average (age-adjusted).                        | 2018       | CDC - BRFSS       | Insufficient Sleep                     |
| Poor Physical Health Days              | Average number of physically unhealthy days reported in past 30 days (age-adjusted).                          | 2019       | CDC - BRFSS       | Poor Physical Health Days              |
| Frequent Mental Distress               | Percentage of adults reporting 14 or more days of poor mental health per month (age-adjusted).                | 2019       | CDC - BRFSS       | Frequent Mental Distress               |
| Frequent Physical Distress             | Percentage of adults reporting 14 or more days of poor physical                                               | 2019       | CDC - BRFSS       | Frequent Physical Distress             |

|                                     |                                                                                                                                                              |           |                |                                     |
|-------------------------------------|--------------------------------------------------------------------------------------------------------------------------------------------------------------|-----------|----------------|-------------------------------------|
|                                     | health per month (age-adjusted).                                                                                                                             |           |                |                                     |
| <b>Socioeconomic Factors</b>        |                                                                                                                                                              |           |                | <b>Socioeconomic Factors</b>        |
| Median Household Income             | The income (US dollar) where half of households in a county earn more and half of households earn less                                                       | 2017      | AHRF           | Median Household Income             |
| Unemployment                        | Percentage of people (aged ≥16 year) unemployed but seeking work                                                                                             | 2017      | BLS            | Unemployment                        |
| Income Inequality                   | Ratio of household income at the 80th percentile to income at the 20th percentile                                                                            | 2015-2019 | Census - ACS   | Income Inequality                   |
| Poverty                             | Percentage of people whose income under the federal poverty level                                                                                            | 2017      | AHRF           | Poverty                             |
| Under 200% Poverty (18-64 years)    | Percentage of people (aged 18–64 year) whose income is under 200% of the federal poverty level                                                               | 2017      | AHRF           | Under 200% Poverty (18-64 years)    |
| Children in Poverty                 | Percentage of people under age 18 in poverty.                                                                                                                | 2020      | Census - SAIGE | Children in Poverty                 |
| High School Completion              | Percentage of people aged ≥ 25 years with a high school diploma or equivalent                                                                                | 2015-2019 | Census - ACS   | High School Completion              |
| Some College Degree                 | Percentage of people (aged 25–44 year) with some post-secondary education                                                                                    | 2015-2019 | Census - ACS   | Some College Degree                 |
| Severe Housing Problems             | Percentage of households with at least 1 of 4 housing problems: overcrowding, high housing costs, lack of kitchen facilities, or lack of plumbing facilities | 2013-2017 | CHAS           | Severe Housing Problems             |
| Severe Housing Cost Burden          | Percentage of households that spend 50% or more of their household income on housing                                                                         | 2015-2019 | Census-ACS     | Severe Housing Cost Burden          |
| Homeownership                       | Percentage of owner-occupied housing units                                                                                                                   | 2015-2019 | Census - ACS   | Homeownership                       |
| Children in Single-Parent Household | Percentage of children that live in a household headed by a single parent.                                                                                   | 2016-2020 | Census - ACS   | Children in Single-Parent Household |
| Limited Access to Healthy Food      | Percentage of people who are low-income and do not live close to a grocery store                                                                             | 2015      | USDA -FEA      | Limited Access to Healthy Food      |

|                              |                                                                                                 |           |             |                              |
|------------------------------|-------------------------------------------------------------------------------------------------|-----------|-------------|------------------------------|
| Food Stamp Recipients        | Percentage of people who were food stamp recipients                                             | 2017      | AHRF        | Food Stamp Recipients        |
| Food Insecurity              | Percentage of people who lack adequate access to food                                           | 2017      | MMG         | Food Insecurity              |
| Food Environment Index       | Index of factors that contribute to a healthy food environment, from 0 (worst) to 10 (best).    | 2019      | USDA - FEA  | Food Environment Index       |
| Social Association           | Number of membership associations per 10,000 population                                         | 2017      | CBP         | Social Association           |
| Injury Deaths                | Number of deaths due to injury per 100,000 population.                                          | 2016-2020 | NVSS        | Injury Deaths                |
| Uninsured Rate               | Percentage of people (aged 18–64 year) without health insurance                                 | 2017      | HRSA - AHRF | Uninsured Rate               |
| Long Commute – Driving Alone | Among workers who commute in their car alone, the percentage that commute more than 30 minutes. | 2016-2020 | Census -ACS | Long Commute – Driving Alone |
| Primary Care Physicians      | Primary care physicians in patient care per 100,000 people                                      | 2017      | HRSA -AHRF  | Primary Care Physicians      |
| Broadband Access             | Percentage of households with broadband internet connection                                     | 2015-2019 | Census -ACS | Broadband Access             |

This table provides the different exposures that we considered in our study. Using a combination of expert knowledge, review of prior literature, and current understanding, we eventually chose 7 different SEDoH which we encompass the different SEDoH measures that are known to be strongly associated with CVD

Abbreviations: AHRF: Area Health Resources Files; ACS: American Community Survey; BLS: Bureau of Labor Statistics; BRFSS: Behavioral Risk Factor Surveillance System; CBP: County Business Patterns; CDC: Centers for Disease Control and Prevention; CHAS: Comprehensive Housing Affordability Strategy; CHF: County Health Rankings & Roadmaps; CMS: Centers for Medicare & Medicaid Services; DSS: US Diabetes Surveillance System; EJSCREEN: Environmental Justice Screening tool ; EPA: Environmental Protection Agency; FEA: Food Environment Atlas; HRSA: Health Resources and Services Administration; MMD: Mapping Medicare Disparities (MMD) Tool; MMG: Map the Meal Gap; NCHHSTP: National Center for HIV/AIDS, Viral Hepatitis, STD, and TB Prevention; NCHS: National Center for Health Statistics; NLP: National Priorities List; PE: Population Estimates; PM: Fine particulate matter; RMP: Risk Management Plan; USDA: US Department of Agriculture.

**eTable 2.** ICD Codes Used to Define CKM

| <b>ICD Code</b> | <b>Description</b>                                        |
|-----------------|-----------------------------------------------------------|
| I10-I15         | Hypertensive diseases                                     |
| I20-I25         | Ischaemic heart diseases                                  |
| I60-I69         | Cerebrovascular diseases                                  |
| I70             | Atherosclerosis                                           |
| I48             | Atrial fibrillation and flutter                           |
| I50             | Heart failure                                             |
| N17-N19         | Renal failure                                             |
| E11             | Non-insulin-dependent diabetes mellitus                   |
| E13             | Other specified diabetes mellitus                         |
| E65             | Localized adiposity                                       |
| E66             | Obesity                                                   |
| E78             | Disorders of lipoprotein metabolism and other lipidaemias |

In this table we present the ICD codes used to define CKM according to the American Heart Association statement

## eMethods

### Statistical Details

Traditional models, like ordinary least square regression, presuppose a consistent relationship between covariates and outcomes throughout the entire studied area. Consequently, these models overlook potential variations in the relationship between outcomes and covariates based on geographical differences within the study area.<sup>1</sup> To account for this non-stationary relationship in space, local models such as Geographically Weighted Regression (GWR) were developed.<sup>1</sup> It is a non-parametric technique that can be expressed by the following formula:

$$y_i = \beta_0(u_i, v_i) + \sum_k \beta_k(u_i, v_i)x_{ik} + \varepsilon_i$$

The coordinates of the  $i$ -th point in space are denoted as  $\beta_0(u_i, v_i)$ , with  $\beta_k(u_i, v_i)$  representing the realization of the continuous function at point  $i$ .<sup>2</sup> This approach allows for the estimation of coefficients at each data location, and observations are weighted based on their proximity to location  $i$ . GWR assumes that observations that are closer to each other have a greater influence than the observations that are farther away.<sup>2</sup> These weights are based on a distance decay function centered on observation  $i$ , which is further adjusted by a bandwidth setting at which the distance weight approaches zero.<sup>2</sup> Since there is a regression equation for each observation, calibrated independently, a  $t$ -ratio and  $R^2$  can be obtained for each observation.<sup>2</sup>

In our study, we used the R Foundation for Statistical Computing (R) package “spgwr” was used to fit the GWR. First, we used the cross-validation method to identify the kernel bandwidth, adopting a Gaussian weighting function and selecting an adaptive kernel type to account for the variation of the density of observations in the study area. Next, we fit the GWR model using the bandwidth previously identified. The  $t$ -ratios obtained (variable coefficient/ variable standard error) from the GWR were converted into two-tailed  $p$  values using the `pt` function in R [`2 * pt(-abs(t-ratio), dfree)`]. Model fit was assessed using  $R^2$  and Akaike Information Criterion-corrected (AICc).

### References:

1. Goovaerts P. Geostatistical Analysis of Health Data: State-of-the-Art and Perspectives. In: Soares A, Pereira MJ, Dimitrakopoulos R, eds. *geoENV VI – Geostatistics for Environmental Applications: Proceedings of the Sixth European Conference on Geostatistics for Environmental Applications*. Quantitative Geology and Geostatistics. Springer Netherlands; 2008:3-22. doi:10.1007/978-1-4020-6448-7\_1
2. Thapa RB, Estoque RC. Geographically Weighted Regression in Geospatial Analysis. In: Murayama Y, ed. *Progress in Geospatial Analysis*. Springer Japan; 2012:85-96. doi:10.1007/978-4-431-54000-7\_6

### R code

#### Bandwidth selection:

```
bwG2 <- gwr.sel(rate_i ~ PM25 + Med_H_income + R_RacialEthnic_Minorities + Food_insecurity + R_Pri_Care_Phys + High_school + Rural_R,
  data = df2.sp,
  gweight = gwr.Gauss,
  verbose = TRUE,
  adapt = TRUE)
```

#### Running the GWR:

```
gwrG2 <- gwr(rate_i ~ PM25 + Med_H_income + R_RacialEthnic_Minorities + Food_insecurity + R_Pri_Care_Phys + High_school + Rural_R,
  data = df2.sp,
  adapt = bwG2,
```

```
gweight = gwr.Gauss,  
hatmatrix = TRUE)
```

### Obtaining the T-ratios and converting them into p-values:

```
#obtain degrees of freedom  
dfree<-gwrG2$results$edf  
#calculate t ratio  
sf_data$pm.t <- gwrG2$SDF$PM25/gwrG2$SDF$PM25_se  
sf_data$food.t <- gwrG2$SDF$Food_insecurity/gwrG2$SDF$Food_insecurity_se  
sf_data$race.t <- gwrG2$SDF$R_RacialEthnic_Minorities/gwrG2$SDF$R_RacialEthnic_Minorities_se  
sf_data$income.t <- gwrG2$SDF$Med_H_income/gwrG2$SDF$Med_H_income_se  
sf_data$pcp.t <- gwrG2$SDF$R_Pri_Care_Phys/gwrG2$SDF$R_Pri_Care_Phys_se  
sf_data$rural.t <- gwrG2$SDF$Rural_R/gwrG2$SDF$Rural_R_se  
sf_data$school.t <- gwrG2$SDF$High_school/gwrG2$SDF$High_school_se  
  
#calculate p values  
sf_data$pm.t.p<-2*pt(-abs(sf_data$pm.t), dfree)  
sf_data$food.t.p<-2*pt(-abs(sf_data$food.t), dfree)  
sf_data$race.t.p<-2*pt(-abs(sf_data$race.t), dfree)  
sf_data$income.t.p<-2*pt(-abs(sf_data$income.t), dfree)  
sf_data$pcp.t.p<-2*pt(-abs(sf_data$pcp.t), dfree)  
sf_data$rural.t.p<-2*pt(-abs(sf_data$rural.t), dfree)  
sf_data$school.t.p<-2*pt(-abs(sf_data$school.t), dfree)
```

Packages used:

1. Geographically weighted models:

sf - Pebesma E, Bivand R (2023). *Spatial Data Science: With applications in R*. Chapman and Hall/CRC. [doi:10.1201/9780429459016](https://doi.org/10.1201/9780429459016), <https://r-spatial.org/book/>.

GWmodel - Isabella Gollini, Binbin Lu, Martin Charlton, Christopher Brunson, Paul Harris (2015). “GWmodel: An R Package for Exploring Spatial Heterogeneity Using Geographically Weighted Models.” *Journal of Statistical Software*, **63**(17), 1–50.[doi:10.18637/jss.v063.i17](https://doi.org/10.18637/jss.v063.i17).

Maps:

usmap - <https://cran.r-project.org/web/packages/usmap/index.html>



**eFigure 1.** Distribution of the County-Level Food Insecurity Rate Tertile in Each US State

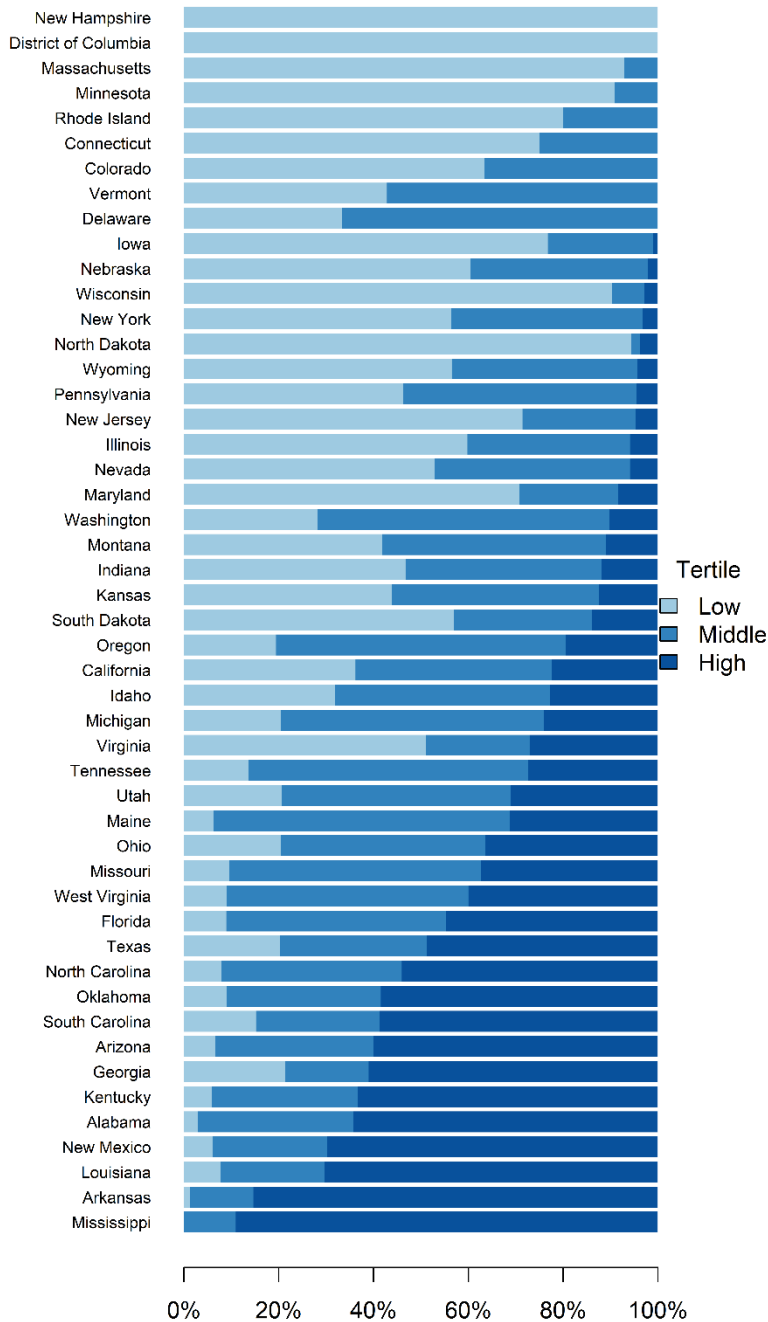

In this bar plot we present the distribution of the tertile for county-level food insecurity rate for all US States. As seen, New Hampshire and the District of Columbia had all counties in the low tertile while a very large proportion of counties in Arkansas and Mississippi were in the high tertile for food insecurity.

**eFigure 2.** Distribution of the Primary Healthcare Access Rate Tertile in Each US State

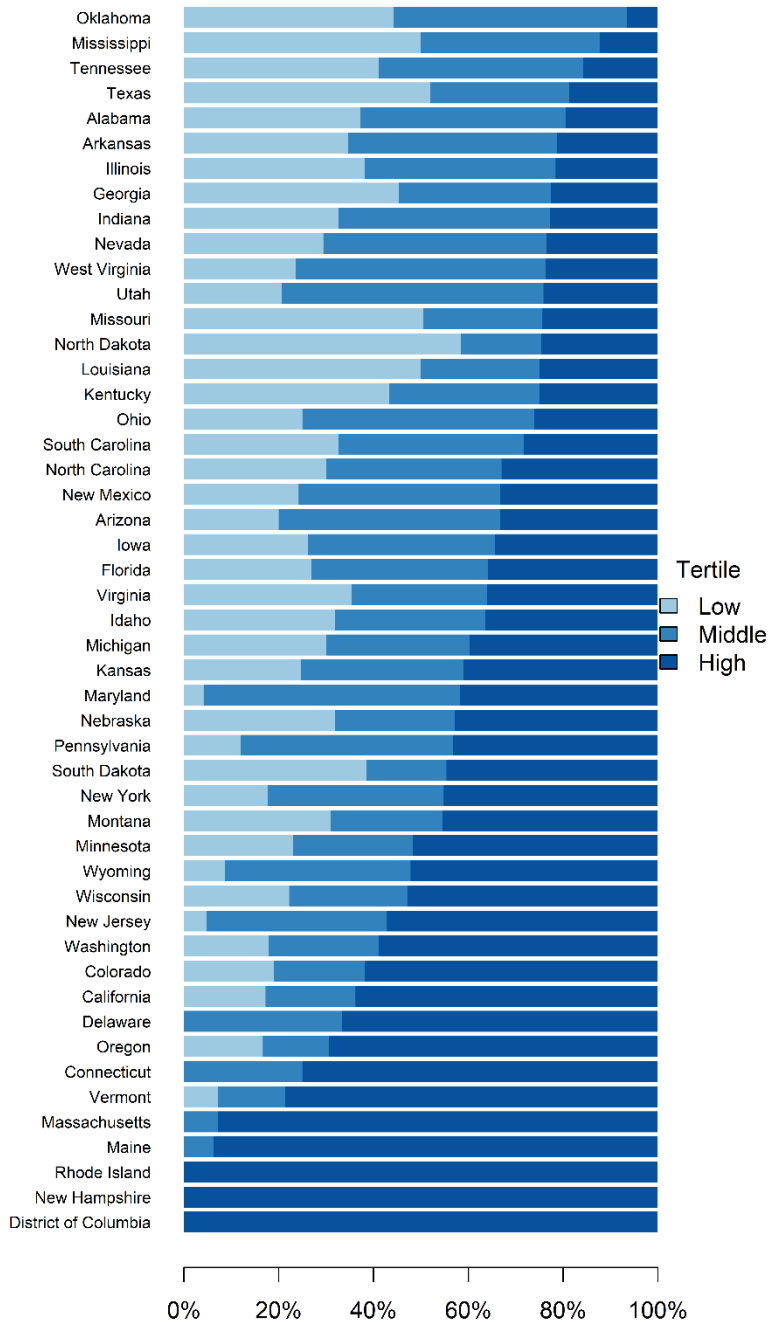

In this bar plot we present the distribution of the tertile for the primary healthcare access rate for all US States. As seen, Oklahoma and Mississippi have many counties in the low tertile for primary healthcare access while Rhode Island, New Hampshire and the District of Columbia had all counties in the high tertile.

**eFigure 3.** Distribution of the Air Pollution Concentration Tertile in Each US State

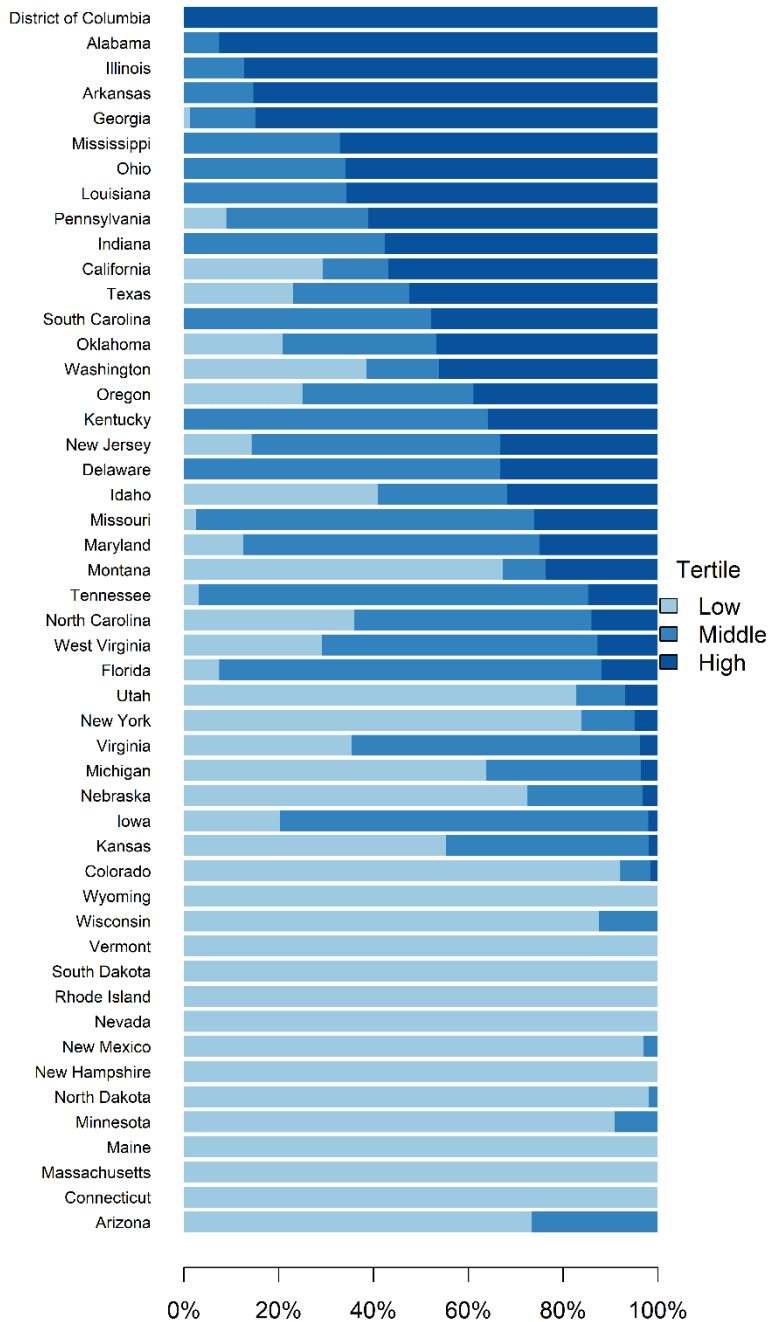

In this barplot, we report the distribution of air pollution (PM<sub>2.5</sub>) tertile that each county belongs to in each US state. As shown here, counties that are in the high tertile for PM<sub>2.5</sub> are quite distributed among states.

**eFigure 4.** Distribution of the Race/Ethnic Minority Rate in Each US State

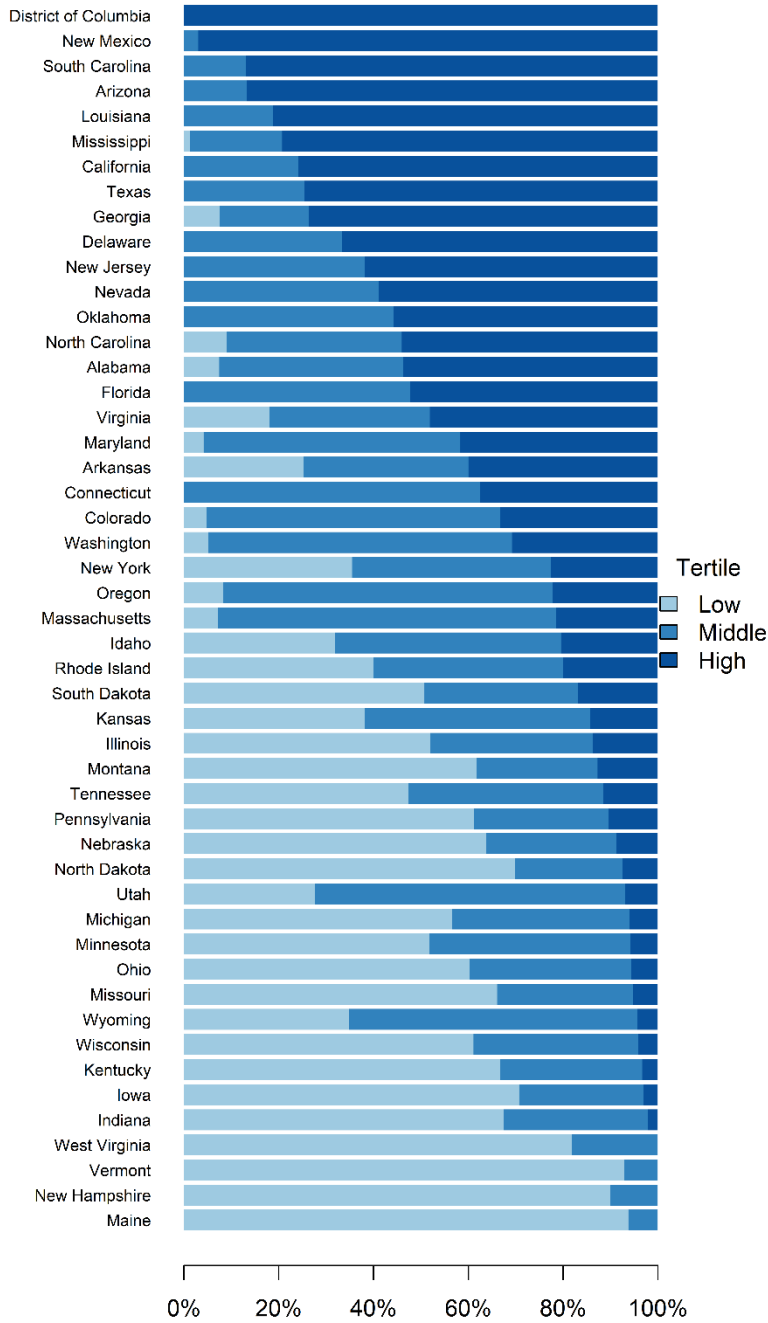

In this barplot, we have presented the tertile for the racial/ethnic minority rate at the county level. The plot depicts the proportion of counties that belong to the low, middle, and high tertile for racial/ethnic minorities in each state. Please note that the District of Columbia is a single county. Hence, New Mexico and South Carolina have a high number of counties in the high tertile while Maine and New Hampshire have many counties in the low tertile.

**eFigure 5.** Distribution of the Rurality Rate in Each US State

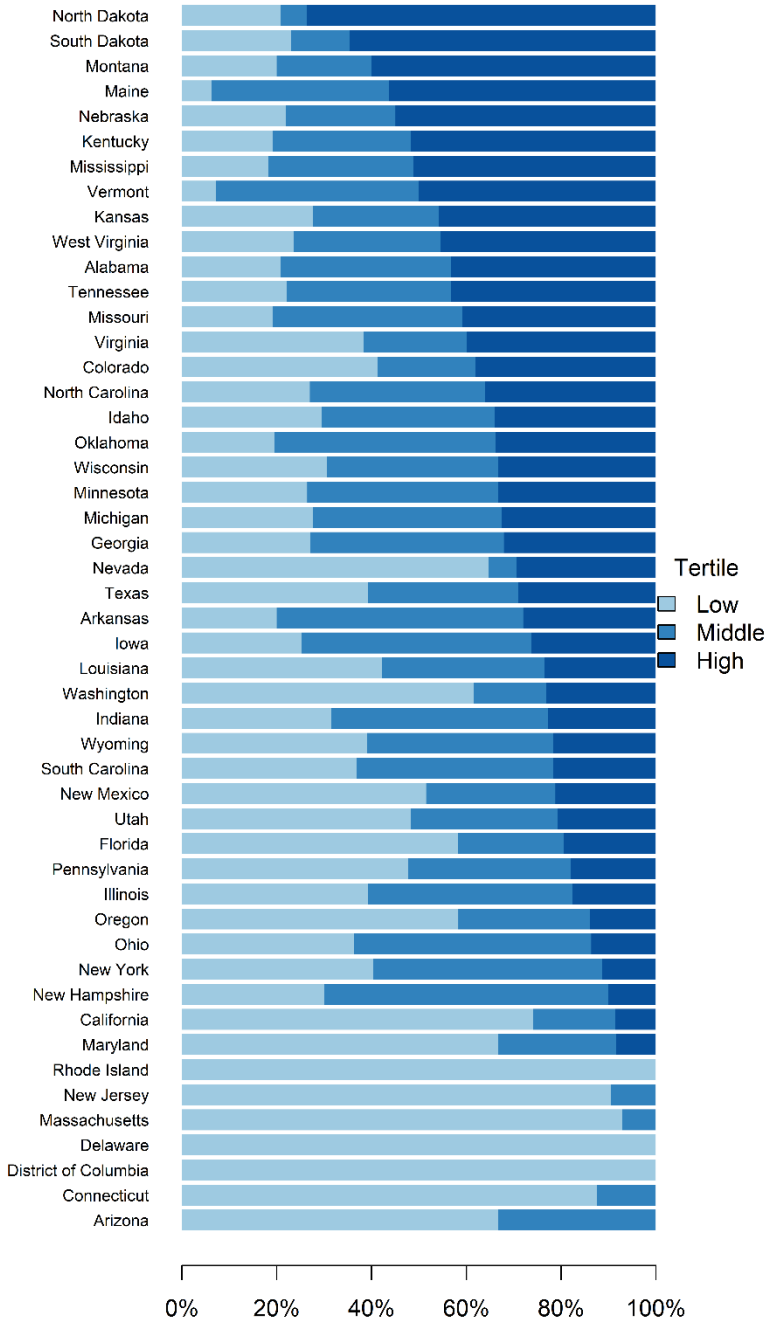

In this barplot, we have presented the tertile for the rurality rate at the county level. The plot depicts the proportion of counties that belong to the low, middle, and high tertile for rurality in each state. North and South Dakota followed by Montana have the most counties in the high tertile for rurality while Connecticut, Arizona, Delaware has many counties in the low tertile for rurality.

**eFigure 6.** Distribution of the High School Completion Rate in Each US State

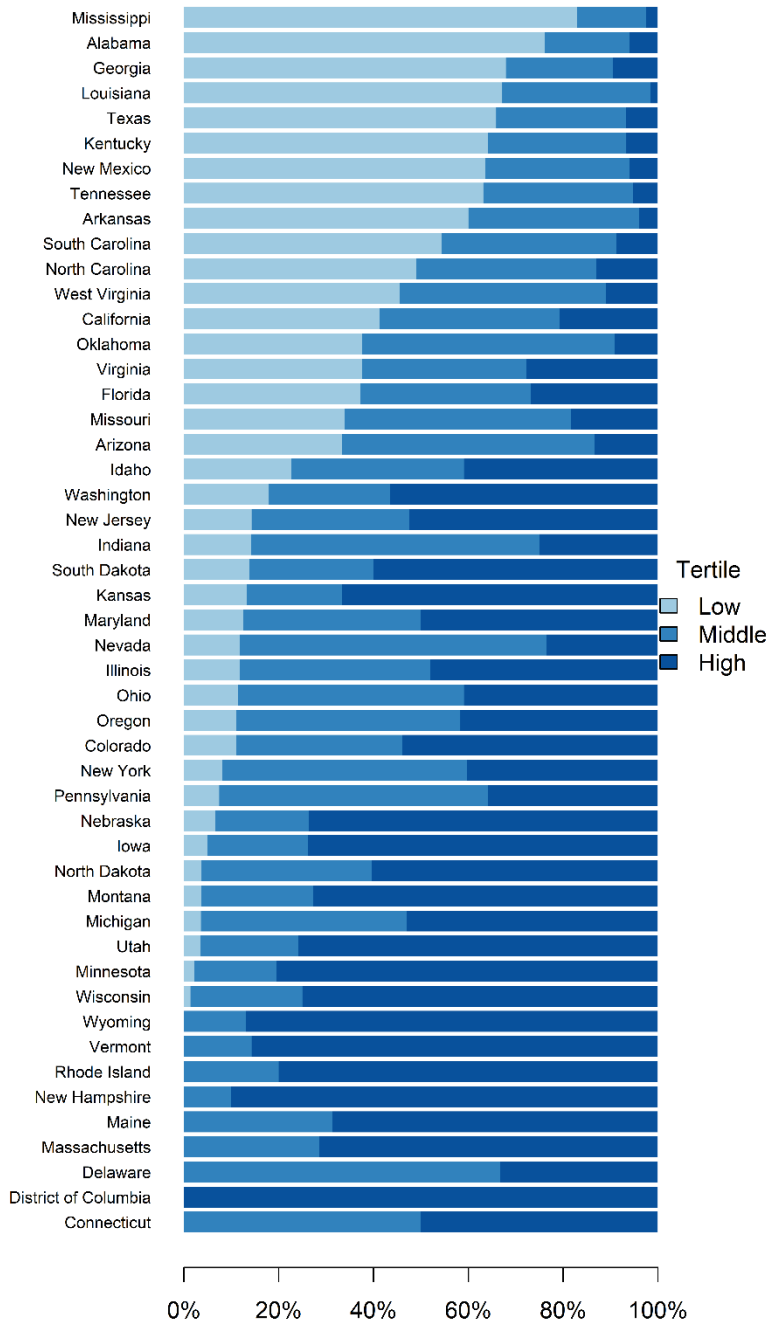

In this barplot, we have presented the tertile for the high school completion rate at the county level. The plot depicts the proportion of counties that belong to the low, middle, and high tertile for high school completion in each state. As shown, Mississippi and Alabama have many counties in the low tertile for high school completion while Connecticut, Delaware, New Hampshire all have very many counties in the high tertile for high school completion. Please note that the the District of Columbia is a single county

**eFigure 7.** Cardio-Kidney-Metabolic Syndrome Related Mortality Rates for Each US State

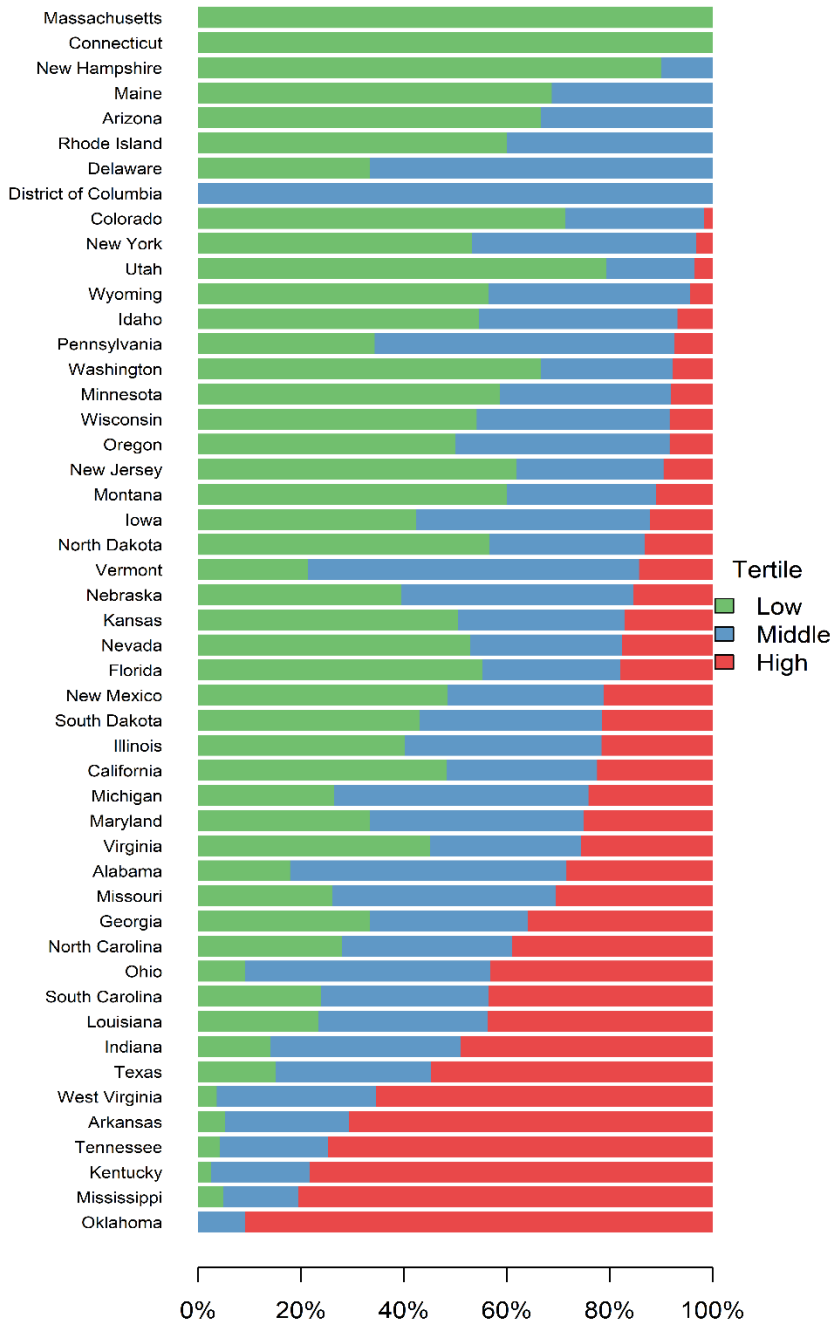

In this bar plot we present the distribution of the tertile for county-level age adjusted all-cause mortality related to cardio-kidney-metabolic syndrome for all US States. As seen, Massachusetts and Connecticut had the best distribution with all counties in the low tertile, while Mississippi and Oklahoma had the worst distribution as a large proportion of counties belonged to the high tertile.

**eTable 3.** Tertile Values for Each SEDoH

| Exposure                                               | Low tertile         | Middle tertile        | High tertile         |
|--------------------------------------------------------|---------------------|-----------------------|----------------------|
| Annual median household income                         | \$22 679 - \$44 471 | > \$44 471 - \$53 492 | > \$53 492 - 136 191 |
| Food insecurity rate                                   | 2.9% - 11.5%        | > 11.5% - 14.4%       | > 14.4% - 36.3%      |
| Primary healthcare access rate (per 100 000 residents) | 0 - 35.1            | > 35.1 - 60.2         | > 60.2 - 514.5       |
| PM <sub>2.5</sub> concentration (µg/m <sup>3</sup> )   | 4.04 - 7.38         | > 7.38 - 8.49         | > 8.49 - 14.98       |
| Racial/ethnic minority rate                            | 2.08% - 9.59%       | > 9.59% - 27.82%      | > 27.82% - 97.24%    |
| Rurality rate                                          | 0 - 43%             | > 43% - 75.3%         | > 75.3% - 100%       |
| High School Completion rate                            | 26.4% - 85.2%       | > 85.2% - 90.5%       | > 90.5% - 98.9%      |

In this table we present the tertile values for each social and environmental determinant of health included in our study.

Abbreviations: SEDoH - social and environmental determinant of health



**eTable 4.** Relative Importance of Exposures

| Exposure                       | R <sup>2</sup> (%)<br>(95% confidence interval) |
|--------------------------------|-------------------------------------------------|
| Median Household income        | 12.9 (1.7, 14.1)                                |
| Food insecurity rate           | 12.7 (10.8, 14.6)                               |
| High school completion rate    | 8.2 (6.6, 10.0)                                 |
| PM <sub>2.5</sub>              | 2.9 (2.1, 3.9)                                  |
| Primary healthcare access rate | 1.9 (1.3, 2.6)                                  |
| Racial/Ethnic minority rate    | 1.4 (1.2, 1.8)                                  |
| Rurality                       | 0.9 (0.7, 1.2)                                  |

This table presents the ranked importance of the exposures as observed in our global model.

**eFigure 8.** Map of  $R^2$  and  $P$ -Values From the Model

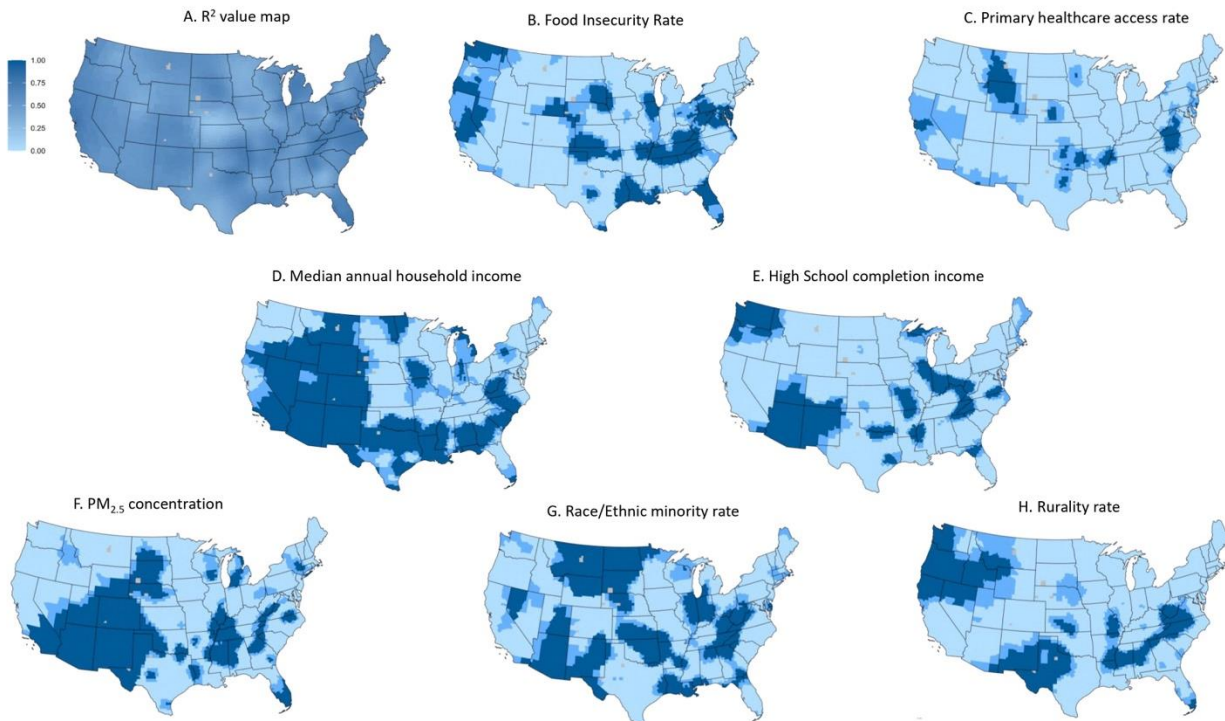

In these panel of maps, we present the results of the multivariable geographically weighted linear regression model fit to explore the association between county-level CKM related all-cause mortality rate and the studied SEDoH. (A) We present the model  $R^2$  reported for each county in the US. A higher  $R^2$  is better as that denotes more explanatory model fit. We observed that most counties reported an  $R^2$  of 75% (0.75) or greater. The  $R^2$  is reported on a continuous scale between 0 – 1 (0%-100%). A darker value represents a higher  $R^2$  value for that county.

(B-H) We present the strength of association between the outcome and each exposure using p-values obtained for each county. Color code: light value  $p > 0.05$  (not statistically significant), middle value  $p < 0.05 - 0.01$  (statistically significant), and dark value  $p < 0.01$  (highly statistically significant). These maps should be studied along with the map of model coefficients presented in Figure 3.

Abbreviations: CKM – cardio-kidney-metabolic syndrome
