# Supplementary material for: Social and Environmental Determinants of Health and Cardio-Kidney-Metabolic Syndrome–Related Mortality
Source: PubMed Central journal article supplement (PMC11427959; doi:10.1001/jamanetworkopen.2024.35783), 2024-09-26
Supplement: jamanetwopen-e2435783-s002.pdf [file jamanetwopen-e2435783-s002.pdf]

## Data Sharing Statement

Vieira de Oliveira Salerno. Social and Environmental Determinants of Health and Cardio-Kidney-Metabolic Syndrome–Related Mortality. *JAMA Netw Open*. Published September 26, 2024. doi:10.1001/jamanetworkopen.2024.35783

### Data

**Data available:** Yes

**Data types:** Data (not involving human participants)

**How to access data:** corresponding authors github page

**When available:** With publication

### Supporting Documents

**Document types:** Statistical/analytic code

**How to access documents:** corresponding authors github page

**When available:** With publication

### Additional Information

**Who can access the data:** all

**Types of analyses:** all analyses

**Mechanisms of data availability:** corresponding authors github page
